# Supplementary material for: Lamellar Polypyrene Based on Attapulgite–Sulfur Composite for Lithium–Sulfur Battery
Source: MDPI journal article supplement (doi:10.3390/membranes11070483), 2021-06-29
Supplement: s1 [file s1]

# Lamellar Polypyrene Based on Attapulgite–Sulfur Composite for Lithium–Sulfur Battery

Jing Wang <sup>1,\*</sup>, Riwei Xu <sup>1</sup>, Chengzhong Wang <sup>1</sup>, Jinping Xiong <sup>1,2,\*</sup>

<sup>1</sup> Beijing Key Laboratory of Electrochemical Process and Technology for Materials, Beijing University of Chemical Technology, Beijing 100029, China; xurw@mail.buct.edu.cn (R.X.); czwang@mail.buct.edu.cn (C.W.)

<sup>2</sup> Fujian Provincial Key Laboratory of Ecological Industry Green Technology, Wuyi University, Wuyishan 354399, China

\* Correspondence: 2020700016@mail.buct.edu.cn (J.W.); xiongjp@mail.buct.edu.cn (J.X.)

**Table S1.** The comparison of the related work.

| Related work    | Synthetic method  | Mixing with Sulfur        | Nano structure            | Electrochemical application                                                             |
|-----------------|-------------------|---------------------------|---------------------------|-----------------------------------------------------------------------------------------|
| PPy-AT [1]      | Chemical          | No                        | Nanotube                  | No                                                                                      |
| Bentonite/S [2] | Physical          | Grinding and co-heating   | Irregular sheet structure | 0.2 C, initial discharge specific capacity: 796 mAh; after 100 cycles: 489mAh.          |
| ATTP@GNs/S [3]  | Physical+Chemical | Grinding and co-heating   | Nanosheets                | 0.1 C, initial discharge specific capacity: 1143.9 mAh/g; after 100 cycles: 512.0 mAh/g |
| AT-S-PPy        | Physical+Chemical | Absorption and co-heating | Lamellar-like structure   | 0.1C, initial discharge specific capacity: 1175 mAh/g; after 100 cycles: 518 mAh/g.     |

## References

1. Zhou, W.; Yu, Y.; Chen, H.; Disalvo, F.J.; Abruña, H.D. Yolk–Shell Structure of Polyaniline-Coated Sulfur for Lithium–Sulfur Batteries. *J. Am. Chem. Soc.* **2013**, *135*, 16736–16743. <https://doi.org/10.1021/ja409508q>.
2. Simmonds, A.G.; Griebel, J.J.; Park, J.; Kim, K.R.; Chung, W.J.; Oleshko, V.P.; Kim, J.; Kim, E.T.; Glass, R.S.; Soles, C.L.; et al. Inverse Vulcanization of Elemental Sulfur to Prepare Polymeric Electrode Materials for Li–S Batteries. *ACS Macro Lett.* **2014**, *3*, 229–232. <https://doi.org/10.1021/mz400649w>.
3. Wang, J.L.; Yang, J.; Xie, J.Y. A novel conductive polymer-sulfur composite cathode material for rechargeable lithium batteries. *Adv Mater.* **2002**, *14*, 963–965. [https://doi.org/10.1002/1521-4095\(20020705\)14:13/14<963::AID-ADMA963>3.0.CO;2-P](https://doi.org/10.1002/1521-4095(20020705)14:13/14<963::AID-ADMA963>3.0.CO;2-P).
